# Supplementary material for: Uniparental mitochondrial DNA inheritance is not affected in Ustilago maydis Δatg11 mutants blocked in mitophagy
Source: PubMed Central journal article supplement (PMC4326477; doi:10.1186/s12866-015-0358-z), 2015-02-06
Supplement: 12866_2015_358_MOESM1_ESM.pdf [file 12866_2015_358_MOESM1_ESM.pdf]

## Additional file 1

**Table S1. *U. maydis* strains used in this study**

| Strain           | Genotype                                                         | Mitotype | Reference  |
|------------------|------------------------------------------------------------------|----------|------------|
| BUB7             | <i>a1 b3</i>                                                     | X1       | [32]       |
| FB2/pMB2-2       | <i>a2 b2 Potef-mtGFP-cbx<sup>R,1</sup></i>                       | F        | [16]       |
| FB2Δatg11/pMB2-2 | <i>a2 b2 atg11::hyg<sup>R</sup> Potef-mtGFP-cbx<sup>R</sup></i>  | F        | [19]       |
| MF34/pKS2        | <i>a1 b14 PcrG1-mtRFP- cbx<sup>R,2</sup></i>                     | W        | [13]       |
| MF34Δatg11/pKS2  | <i>a1 b14 atg11::hyg<sup>R</sup> PcrG1-mtRFP-cbx<sup>R</sup></i> | W        | This study |
| FB1/pMB2-2       | <i>a1 b1 Potef-mtGFP-cbx<sup>R</sup></i>                         | F        | [16]       |
| FB1Δatg11/pMB2-2 | <i>a1 b1 atg11::hyg<sup>R</sup> Potef-mtGFP-cbx<sup>R</sup></i>  | F        | [19]       |
| GF5/pKS1         | <i>a2 b13 PcrG1-mtGFP-cbx<sup>R</sup></i>                        | W        | [13]       |
| GF5Δatg11/pKS1   | <i>a2 b13 atg11::hyg<sup>R</sup> PcrG1-mtGFP-cbx<sup>R</sup></i> | W        | This study |

cbx: carboxin resistance cassette; hyg: hygromycin resistance cassette.

<sup>1</sup>*Potef*: expression under the constitutive *otef* promoter.

<sup>2</sup>*PcrG1*: expression under the inducible *crg1* promoter.
